# Supplementary material for: Identification of Autophagy-Related Genes and Their Regulatory miRNAs Associated with Celiac Disease in Children
Source: PubMed Central journal article supplement (PMC5343926; doi:10.3390/ijms18020391), 2017-02-12
Supplement: ijms-18-00391-s001.pdf [file ijms-18-00391-s001.pdf]

# Supplementary Materials: Identification of Autophagy-Related Genes and Their Regulatory miRNAs Associated with Celiac Disease in Children

Sergio Comincini, Federico Manai, Cristina Meazza, Sara Pagani, Carolina Martinelli, Noemi Pasqua, Gloria Pelizzo, Marco Biggiogera and Mauro Bozzola

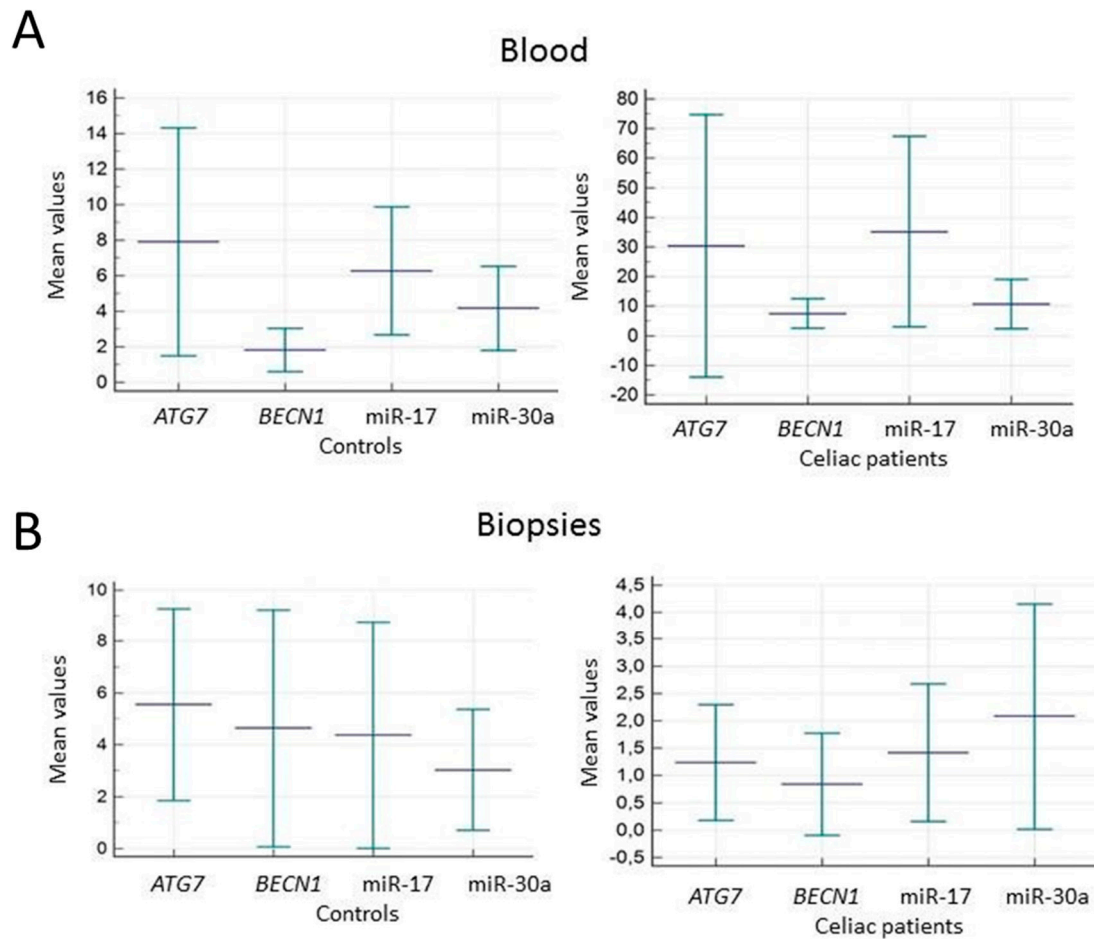

**Figure S1.** Distribution of the investigated autophagy-related genes (*ATG7* and *BECN1*) and their regulatory miRNAs (miR-17 and miR-30a) in blood (**A**) and biopsies (**B**). The expression values are reported as mean and 95% C.I.

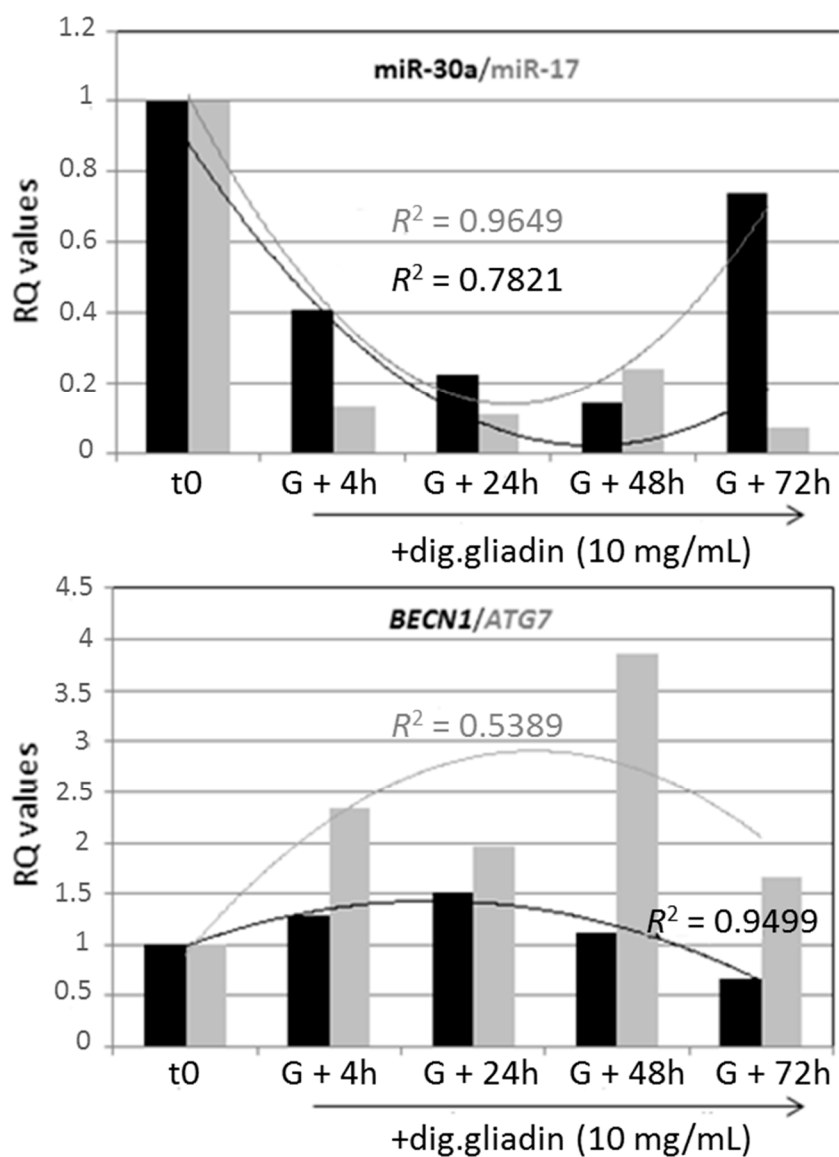

**Figure S2.** Relative quantitative expression (RQ) of autophagy-related genes (*ATG7* and *BECN1*) and their regulatory miRNAs (miR-17 and miR-30a), following digested gliadin administration at different post-treatment times. Normalization was referred to untreated conditions. Exponential regression trends and their significance ( $R^2$ ) are reported.

**Table S1.** Unsupervised analysis of celiac disease classification performance adopting the expression values of the investigated genes/miRNAs in the peripheral blood.

| <b>Unsupervised Analysis for Blood Samples</b> |                  |                                       |                       |
|------------------------------------------------|------------------|---------------------------------------|-----------------------|
| <b>Subject</b>                                 | <b>Diagnosis</b> | <b>CD vs. Control<br/>Probability</b> | <b>Classification</b> |
| 1                                              | Celiac disease   | 1.00 : 0.00                           | Celiac disease        |
| 2                                              | Celiac disease   | 0.50 : 0.50                           | Celiac disease        |
| 3                                              | Celiac disease   | 0.67 : 0.33                           | Celiac disease        |
| 4                                              | Celiac disease   | 1.00 : 0.00                           | Celiac disease        |
| 5                                              | Celiac disease   | 1.00 : 0.00                           | Celiac disease        |
| 6                                              | Celiac disease   | 1.00 : 0.00                           | Celiac disease        |
| 7                                              | Celiac disease   | 0.75 : 0.25                           | Celiac disease        |
| 8                                              | Celiac disease   | 1.00 : 0.00                           | Celiac disease        |
| 9                                              | Celiac disease   | 1.00 : 0.00                           | Celiac disease        |
| 10                                             | Celiac disease   | 0.33 : 0.67                           | Control *             |
| 11                                             | Celiac disease   | 0.67 : 0.33                           | Celiac disease        |
| 12                                             | Celiac disease   | 1.00 : 0.00                           | Celiac disease        |
| 13                                             | Celiac disease   | 1.00 : 0.00                           | Celiac disease        |
| 14                                             | Celiac disease   | 1.00 : 0.00                           | Celiac disease        |
| 15                                             | Celiac disease   | 1.00 : 0.00                           | Celiac disease        |
| 16                                             | Celiac disease   | 0.75 : 0.25                           | Celiac disease        |
| 17                                             | Celiac disease   | 1.00 : 0.00                           | Celiac disease        |
| 18                                             | Celiac disease   | 1.00 : 0.00                           | Celiac disease        |
| 19                                             | Celiac disease   | 0.75 : 0.25                           | Celiac disease        |
| 20                                             | Celiac disease   | 1.00 : 0.00                           | Celiac disease        |
| 21                                             | Celiac disease   | 1.00 : 0.00                           | Celiac disease        |
| 22                                             | Celiac disease   | 1.00 : 0.00                           | Celiac disease        |
| 23                                             | Celiac disease   | 1.00 : 0.00                           | Celiac disease        |
| 24                                             | Control          | 0.00 : 1.00                           | Control               |
| 25                                             | Control          | 0.00 : 1.00                           | Control               |
| 26                                             | Control          | 0.00 : 1.00                           | Control               |
| 27                                             | Control          | 0.00 : 1.00                           | Control               |
| 28                                             | Control          | 0.00 : 1.00                           | Control               |
| 29                                             | Control          | 0.50 : 0.50                           | Celiac disease *      |
| 30                                             | Control          | 0.00 : 1.00                           | Control               |
| 31                                             | Control          | 0.00 : 1.00                           | Control               |
| 32                                             | Control          | 0.00 : 1.00                           | Control               |
| 33                                             | Control          | 0.00 : 1.00                           | Control               |
| 34                                             | Control          | 0.00 : 1.00                           | Control               |
| 35                                             | Control          | 0.00 : 1.00                           | Control               |
| 36                                             | Control          | 0.67 : 0.33                           | Celiac disease *      |
| 37                                             | Control          | 0.00 : 1.00                           | Control               |
| 38                                             | Control          | 0.00 : 1.00                           | Control               |
| 39                                             | Control          | 0.00 : 1.00                           | Control               |
| 40                                             | Control          | 0.00 : 1.00                           | Control               |
| 41                                             | Control          | 0.33 : 0.67                           | Control               |
| 42                                             | Control          | 0.00 : 1.00                           | Control               |
| 43                                             | Control          | 0.33 : 0.67                           | Control               |
| 44                                             | Control          | 0.00 : 1.00                           | Control               |

**Table S1.** Cont.

| Unsupervised Analysis for Blood Samples |           |                            |                  |
|-----------------------------------------|-----------|----------------------------|------------------|
| Subject                                 | Diagnosis | CD vs. Control Probability | Classification   |
| 45                                      | Control   | 0.00 : 1.00                | Control          |
| 46                                      | Control   | 0.00 : 1.00                | Control          |
| 47                                      | Control   | 0.00 : 1.00                | Control          |
| 48                                      | Control   | 0.00 : 1.00                | Control          |
| 49                                      | Control   | 0.00 : 1.00                | Control          |
| 50                                      | Control   | 0.00 : 1.00                | Control          |
| 51                                      | Control   | 0.00 : 1.00                | Control          |
| 52                                      | Control   | 0.00 : 1.00                | Control          |
| 53                                      | Control   | 0.00 : 1.00                | Control          |
| 54                                      | Control   | 0.00 : 1.00                | Control          |
| 55                                      | Control   | 0.00 : 1.00                | Control          |
| 56                                      | Control   | 0.75 : 0.25                | Celiac disease * |

Celiac disease vs. control probability was calculated (second column) in order to compare the obtained classification with the diagnosis. Asterisks highlight misclassified subjects.

**Table S2.** Unsupervised analysis of celiac disease classification performance adopting the expression values of the investigated genes/miRNAs in the intestinal biopsies.

| Unsupervised Analysis for Intestinal Biopsies |                |                            |                |
|-----------------------------------------------|----------------|----------------------------|----------------|
| Subject                                       | Diagnosis      | CD vs. Control Probability | Classification |
| 1                                             | Celiac disease | 1.00 : 0.00                | Celiac disease |
| 2                                             | Celiac disease | 1.00 : 0.00                | Celiac disease |
| 3                                             | Celiac disease | 1.00 : 0.00                | Celiac disease |
| 4                                             | Celiac disease | 1.00 : 0.00                | Celiac disease |
| 5                                             | Celiac disease | 1.00 : 0.00                | Celiac disease |
| 6                                             | Celiac disease | 1.00 : 0.00                | Celiac disease |
| 7                                             | Celiac disease | 0.33 : 0.67                | Control *      |
| 8                                             | Celiac disease | 1.00 : 0.00                | Celiac disease |
| 9                                             | Celiac disease | 1.00 : 0.00                | Celiac disease |
| 10                                            | Celiac disease | 1.00 : 0.00                | Celiac disease |
| 11                                            | Celiac disease | 1.00 : 0.00                | Celiac disease |
| 12                                            | Celiac disease | 1.00 : 0.00                | Celiac disease |
| 13                                            | Celiac disease | 1.00 : 0.00                | Celiac disease |
| 14                                            | Celiac disease | 1.00 : 0.00                | Celiac disease |
| 15                                            | Celiac disease | 0.33 : 0.67                | Control *      |
| 16                                            | Celiac disease | 1.00 : 0.00                | Celiac disease |
| 17                                            | Celiac disease | 1.00 : 0.00                | Celiac disease |
| 18                                            | Celiac disease | 1.00 : 0.00                | Celiac disease |
| 19                                            | Celiac disease | 1.00 : 0.00                | Celiac disease |
| 20                                            | Celiac disease | 1.00 : 0.00                | Celiac disease |
| 21                                            | Celiac disease | 0.50 : 0.50                | Celiac disease |
| 22                                            | Celiac disease | 1.00 : 0.00                | Celiac disease |
| 23                                            | Celiac disease | 1.00 : 0.00                | Celiac disease |
| 24                                            | Celiac disease | 1.00 : 0.00                | Celiac disease |
| 25                                            | Celiac disease | 1.00 : 0.00                | Celiac disease |
| 26                                            | Control        | 0.00 : 1.00                | Control        |
| 27                                            | Control        | 0.00 : 1.00                | Control        |

**Table S2.** Cont.

| Unsupervised Analysis for Intestinal Biopsies |           |                            |                  |
|-----------------------------------------------|-----------|----------------------------|------------------|
| Subject                                       | Diagnosis | CD vs. Control Probability | Classification   |
| 28                                            | Control   | 0.00 : 1.00                | Control          |
| 29                                            | Control   | 0.00 : 1.00                | Control          |
| 30                                            | Control   | 0.00 : 1.00                | Control          |
| 31                                            | Control   | 0.00 : 1.00                | Control          |
| 32                                            | Control   | 0.33 : 0.67                | Control          |
| 33                                            | Control   | 0.00 : 1.00                | Control          |
| 34                                            | Control   | 0.00 : 1.00                | Control          |
| 35                                            | Control   | 0.33 : 0.67                | Control          |
| 36                                            | Control   | 0.00 : 1.00                | Control          |
| 37                                            | Control   | 0.00 : 1.00                | Control          |
| 38                                            | Control   | 0.00 : 1.00                | Control          |
| 39                                            | Control   | 0.00 : 1.00                | Control          |
| 40                                            | Control   | 0.00 : 1.00                | Control          |
| 41                                            | Control   | 0.00 : 1.00                | Control          |
| 42                                            | Control   | 0.00 : 1.00                | Control          |
| 43                                            | Control   | 0.00 : 1.00                | Control          |
| 44                                            | Control   | 0.00 : 1.00                | Control          |
| 45                                            | Control   | 0.33 : 0.67                | Control          |
| 46                                            | Control   | 0.00 : 1.00                | Control          |
| 47                                            | Control   | 0.33 : 0.67                | Control          |
| 48                                            | Control   | 0.00 : 1.00                | Control          |
| 49                                            | Control   | 0.50 : 0.50                | Celiac disease * |

Celiac disease vs. control probability was calculated (second column) in order to compare the obtained classification with the diagnosis. Asterisks highlight misclassified subjects.

**Table S3.** Clinical and serological data of the CD patients and controls enrolled in the study.

| Parameters                                                                        | Group 1 (CD Patients) | Group 2 (Controls) |
|-----------------------------------------------------------------------------------|-----------------------|--------------------|
| No.                                                                               | 25                    | 33                 |
| Sex                                                                               | 11 M, 14 F            | 16 M, 17 F         |
| Age                                                                               | 9.4 ± 4.4             | 9.4 ± 3.9          |
| Height SDS                                                                        | 0.5 ± 1.6             | -0.31 ± 1.48       |
| BMI SDS                                                                           | -0.88 ± 1.29          | -0.80 ± 1.99       |
| Positive serological test for CD<br>(anti-tTG IgA/IgG and/or anti-endomysial IgA) | 25/25                 | 0/33               |
| Confirmatory biopsy for CD                                                        | 25/25                 | 0/33               |

Height and body mass index (BMI) are indicated as standard deviation scores (SDS).
